# Supplementary material
Source: publisher site journal article supplement (https://www.dovepress.com/article/291699)
Supplement: Supplementary file 1 [file get_supplementary_file.php]

## Supplementary Figure Legend

Supplementary Figure 1: TEAS treatment acupoints

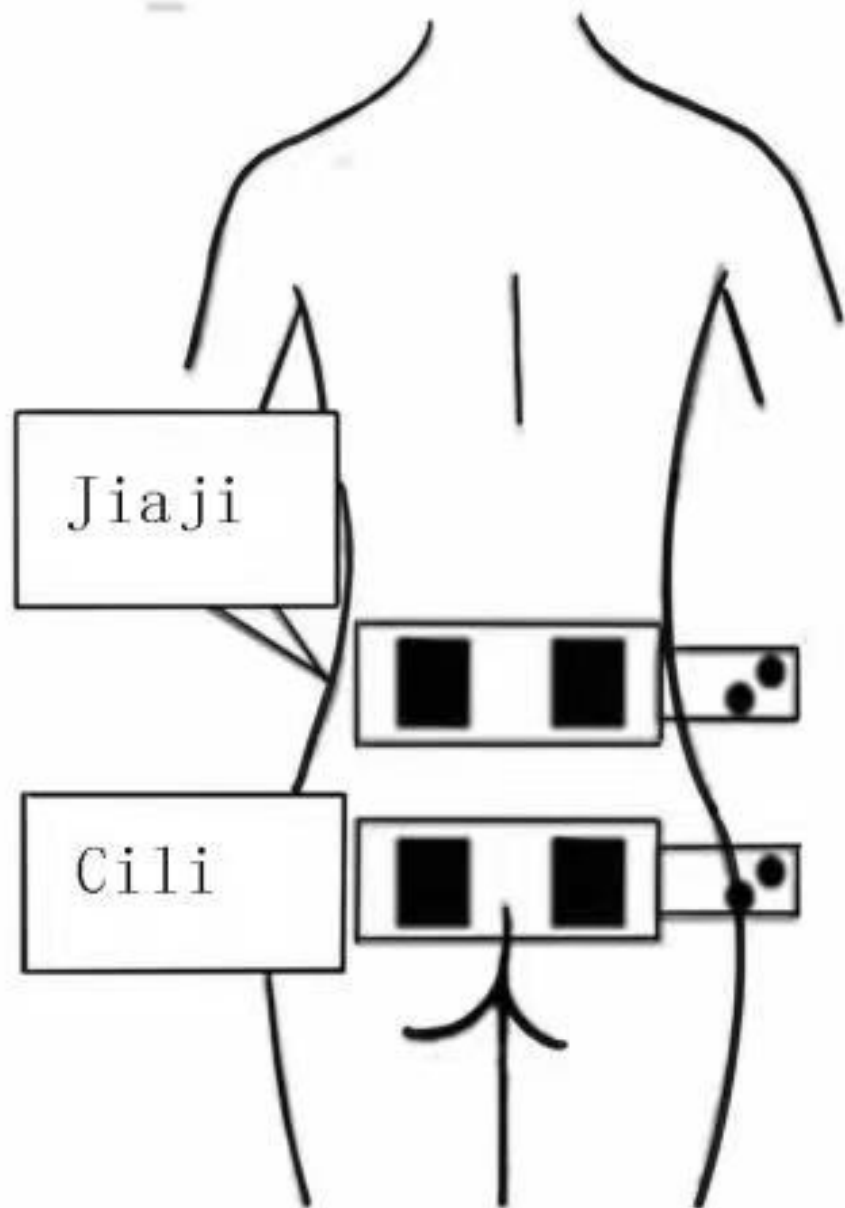

Waist electrode piece

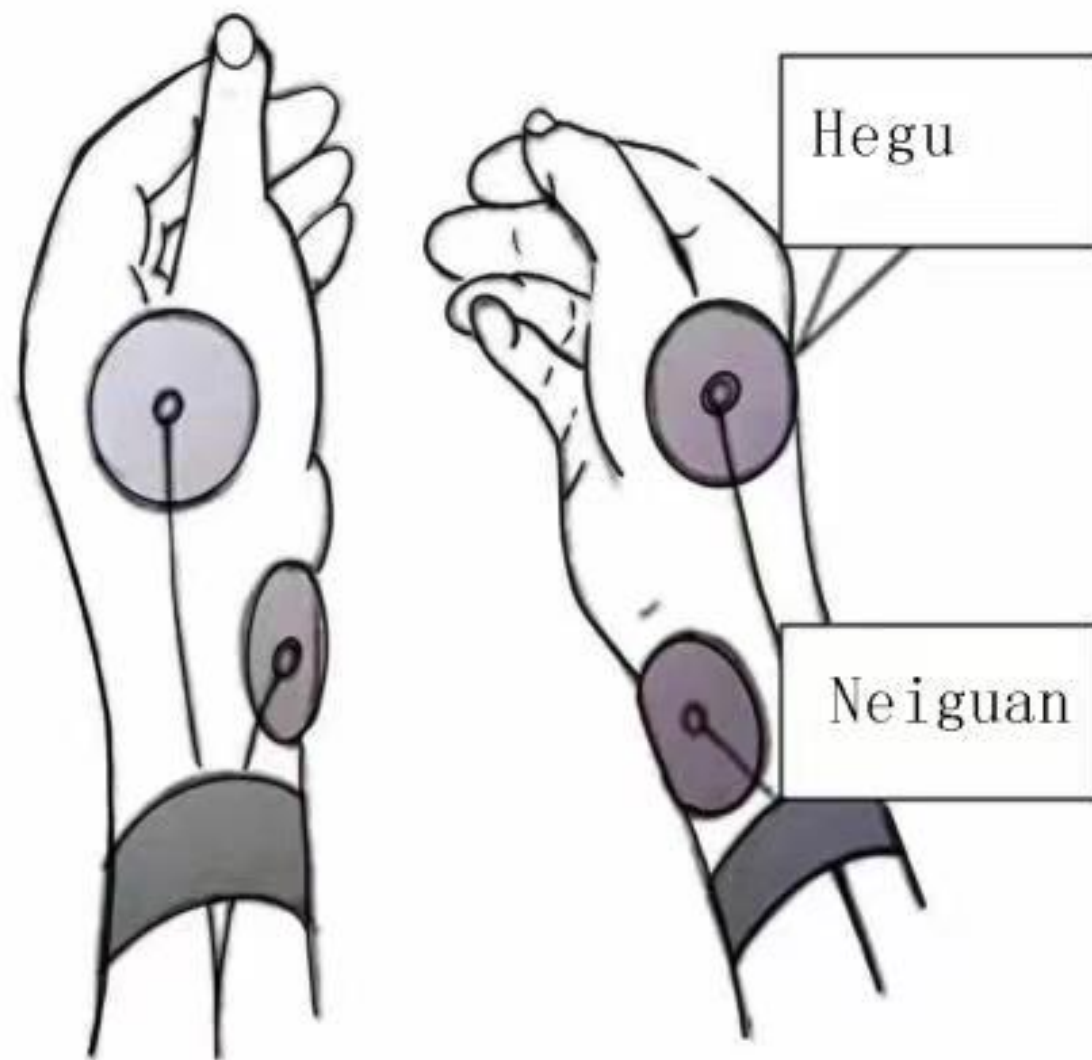

Hand electrode piece
